# Supplementary material for: Prosocial lie-telling in preschoolers: The impacts of ethnic background, parental factors, and perceived consequence for the partner
Source: Front Psychol. 2023 Mar 30;14:1128685. doi: 10.3389/fpsyg.2023.1128685 (PMC10098184; doi:10.3389/fpsyg.2023.1128685)
Supplement: Supplementary file 3 [file Data_Sheet_1.xlsx]

## Sheet: Prosocial lie-telling
ID	Age_Years	Age_Months	Gender	Ethnic_Group	Parent_Born_Canada	Condition	Reverse_Rouge_Task	ArtRating_Task	Authoritative_Parenting	Authoritarian_Parenting	Permissive_Parenting	Horizontal_Individualism	Vertical_Individualism	Horizontal_Collectivism	Vertical_Collectivism
F01	4	52	0	1	1	2	1	2	4.2	2.25	2.4	5	5	7.75	5.5
F02	4	57	0	1	0	1	1	0	4.06667	2.58333	2	6.25	5	8.5	5.75
F03	5	66	0	0	1	2	1	0	4.53333	1.25	1.8	7.5	1.75	9	6
F04	5	66	0	0	1	1	1	2	4.73333	1.33333	2.4	4.75	5	7.25	7
F05	5	69	0	0	1	1	1	0	4.4	1.33333	1.2	5.5	1.25	9	7
F06	4	52	0	0	1	2	1	2	4.33333	1.41667	2.6	7	5.25	7.75	7
F07	4	48	0	0	1	2	1	0	4.46667	1.91667	3	7.75	5.25	7.25	8.25
F08	4	52	0	1	0	1	1	1	4.86667	2.25	3	8	6.75	8	8.25
F09	4	59	0	0	1	2	1	2	4.66667	1.58333	2.2	9	4.25	8.75	6
F10	4	49	0	1	1	1	0	2	3.73333	1.83333	3	7	4.5	7.5	6.25
F11	4	54	0	0	1	2	1	2	4.73333	1.16667	1.8	7.5	2.5	8.5	7
F12	4	50	0	0	1	2	1	1	4.6	1.75	2	8.5	4.5	8.5	5
F13	5	60	0	0	1	1	1	1	4.26667	1.91667	1.8	5.25	5.75	6.5	6.25
F14	4	57	0	0	1	1	1	2	3.86667	1.91667	2.8	7.25	4.5	6.25	7
F15	4	53	0	1	0	2	1	2	4.6	2.83333	3	8.5	7.25	5.75	6.25
F16	5	60	0	0	0	2	1	2	4.4	1.33333	1.4	5.75	4.25	7	4.5
F17	4	55	0	1	0	2	1	1	4.46667	1.66667	1.8	4	7.25	7.5	5.75
F18	4	58	0	1	0	1	0	0	4	2.91667	3.75	4.75	6.25	7.25	6
F19	5	63	0	0	1	1	1	0	4.33333	1.41667	2.25	5.5	3.25	7.5	6.5
F20	4	53	0	0	1	1	1	1	4.73333	1.33333	2	6.75	1.75	8.5	8.5
F22	5	63	0	0	1	2	1	2	4.2	1.83333	3.6	7.25	5	7	5.75
F23	5	69	0	1	1	2	1	1	3.8	2.08333	3.8	6	3.75	7.5	6.75
F24	5	62	0	0	1	1	1	2	4.66667	1.75	1.6	6.25	3.75	8	6.75
F25	5	62	0	0	1	2	0	0	3.8	2.08333	2.2	8	3	8	6.75
F26	5	64	0	1	1	2	1	1	4.53333	1.5	3.4	5.25	6.75	8.25	6.5
F27	4	48	0	0	1	2	1	1	4.73333	1.41667	2.4	6.75	3	8.25	6
F28	4	58	0	1	0	2	0	0	4.46667	1.66667	1.6	6.75	6	9	7.75
F29	5	61	0	1	0	1	1	1	4.46667	2.08333	2.2	5.25	6.5	6.5	5.25
F30	4	56	0	0	1	1	0	0	4.07	1.67	3	5.5	3.75	6	5
F31	4	58	0	0	1	2	1	0	3.6	2.08	2.6	4.25	6	7.75	5.25
F32	4	58	0	0	1	1	1	1	4.6	1.58	2.4	5.5	2.25	6.75	8.5
F33	6	72	0	1	0	1	1	2	4.87	1.75	1.4	7	3	7.25	3.5
F34	4	52	0	1	0	1	1	2	5	1.75	2	7.25	4	7.25	3.5
F35	5	64	0	0	1	1	0	0	4.5	1.42	3	5.5	3.25	7	5.75
F36	4	53	0	0	1	1	1	2	4.6	1.58	2.2	3.75	2.75	8.75	5.5
F37	4	57	0	1	0	1	#NULL!	0	4.47	1.5	2.4	3.25	3.25	6.75	8
F38	4	57	0	1	1	2	1	2	4.6	2	3.2	6.25	7.25	8.75	8.75
F39	5	68	0	1	0	2	1	0	4.4	2	3	6	6.25	6.75	7.25
F40	5	65	0	1	0	2	1	1	3.8	3.67	3.4	7.5	7	7.5	6.75
F41	5	70	0	1	0	1	1	1	4.13	1.83	1.8	5.25	5.5	7.75	8
F42	4	57	0	1	1	2	1	2	4.64	2.33	1.8	6	5	6	5.75
F43	5	67	0	1	1	2	0	0	4.27	2	2	5.75	4	7.75	6
F44	5	66	0	1	0	1	1	2	3.93	2.42	3.2	5.5	5.5	6.5	7
F45	5	71	0	0	1	2	1	2	4.27	1.25	2	6.25	3.5	6.75	8
F46	5	60	0	0	1	1	0	2	3.8	1.75	2.6	6.25	4.5	8.5	7.25
F47	4	53	0	1	0	2	1	1	4.79	1.17	1.6	7.25	5	8.5	7.5
F48	5	61	0	0	1	2	1	2	3.87	1.92	3.2	6.25	5.25	7.25	5.25
F49	5	70	0	0	0	1	1	0	4.2	2.25	2.2	6.5	5	6	6.5
F50	4	54	0	0	1	1	1	2	4.8	1.25	2.2	3.5	4	8.25	6.75
F52	4	52	0	1	#NULL!	1	0	2	5	1	#NULL!	#NULL!	#NULL!	#NULL!	#NULL!
F53	4	48	0	1	0	1	1	2	4.47	1.33	2.6	5	4.5	7.5	6.25
F58	4	58	0	1	0	2	1	0	4.33	2.58	3.2	4.5	4.25	7.75	8.75
F59	5	65	0	1	1	1	0	0	4.27	1.75	2.8	6.25	6.75	7.75	8.75
F61	4	48	0	1	1	2	1	2	4.33	1.75	3.2	7	5.5	7.75	7
F62	4	51	0	1	0	2	1	0	4.07	1.83	2	5.75	3.25	7.5	5.75
F63	4	48	0	1	1	2	1	0	3.4	2.08	2.4	6.25	4.75	7.25	4.75
M01	4	52	1	1	1	1	1	2	3.93333	1.5	2.6	7.75	4.25	8.25	7.75
M03	4	57	1	0	1	1	1	2	3.93333	2.08333	2.8	6.75	6.25	5.75	7.25
M04	4	57	1	0	1	2	1	2	4.13333	1.58333	2	5	4.25	6	6.75
M05	4	50	1	0	1	1	1	2	4.46667	1.33333	2.4	8	5	6	6.25
M06	4	57	1	1	0	2	1	0	4.6	1.33333	2.8	5.25	5	9	8
M07	4	52	1	0	1	2	1	2	4.4	1.83333	1.8	7.25	4.5	7.25	7
M09	4	53	1	0	1	1	1	2	4.26667	2	2.6	8.25	6	6.25	8.75
M10	4	59	1	0	1	2	1	2	4.73333	1.66667	2	6.5	4	7.25	5.25
M11	4	48	1	0	1	1	1	2	4	1.5	2.8	4.75	4.75	7.75	5.75
M12	4	57	1	0	1	1	1	1	4.06667	1.75	2.8	8	4.75	6	7
M13	5	61	1	1	1	2	1	0	4	4	4	7	6.25	6.75	6.5
M14	4	55	1	0	1	2	1	1	4.13333	1.75	1.6	6.25	3.75	6.75	4.75
M15	5	65	1	0	0	2	1	2	4.26667	1.58333	2	6	4.5	7.75	5.75
M17	5	63	1	0	1	1	1	1	3.8	1.41667	2.4	6	3.75	6.75	7
M18	5	70	1	0	1	2	0	2	4.53333	2	2.4	3.5	3.25	8.25	6
M19	5	63	1	1	0	2	1	2	4.93333	1.25	2	5	5	5	5.75
M20	4	56	1	0	1	1	1	0	3.6	2.25	2.4	6.5	6	7.75	5.5
M21	5	68	1	1	0	1	1	2	4.73333	1.75	2.6	5	4.5	7.75	6.25
M22	5	66	1	1	0	1	0	0	3.73333	2.33333	2.6	7.25	5	7.25	7.5
M23	5	61	1	1	1	1	1	2	4.33333	1.41667	1.6	7.25	5.75	7.75	8.25
M24	4	49	1	0	1	1	1	0	5	1	2	6.5	4.33333	7.5	4
M25	4	54	1	0	1	2	0	0	4	1.27	2.6	7.75	2.25	7.25	6.75
M26	5	70	1	1	0	2	0	2	4.07	2.08	3	4.5	5.25	7.75	7
M27	4	52	1	0	1	1	1	1	4.2	2.08	2.6	7.5	3.5	8.5	5.5
M28	4	59	1	0	1	1	1	2	4.27	1.08	2.6	4.75	4.25	5.75	6.33333
M29	5	64	1	1	1	2	1	1	4.47	2.25	2.4	5.75	5.25	7.25	7.5
M30	4	50	1	1	1	1	0	1	3.87	2	2.8	5.5	4.5	7.75	6
M31	5	68	1	0	1	2	1	0	3.93	1.75	1.8	5.75	3.5	7.5	6.25
M33	4	52	1	1	0	2	1	1	4.2	2.83	1.4	6.5	2.75	7.5	6.5
M34	5	67	1	1	0	2	1	1	4.47	1.45	1.6	6.25	4	8.5	5.5
M35	4	48	1	0	1	2	1	2	4.8	1.33	1.4	4.25	4.25	8.5	8.5
M36	4	54	1	1	1	1	1	0	4.6	2.33	2	5.75	3.5	7.75	4
M37	5	60	1	0	1	1	1	2	4.4	2.08	2.4	7	4	7.25	8.25
M38	5	66	1	1	0	1	1	2	4.4	1.75	2.2	5.5	5	8.25	6.5
M39	5	66	1	1	0	1	1	0	4.4	1.67	2.6	5	5	8.5	9
M40	4	59	1	1	0	1	1	0	3.93	1.92	2.2	5.25	3.75	6	4.75
M41	5	69	1	0	1	2	0	1	4.87	1.83	2.8	5.25	3	8.25	4.75
M42	4	48	1	0	1	2	1	2	4.33	2	2.4	6.5	3.5	7.5	5.25
